# Supplementary material for: Time Series Analysis of the Microbiota of Children Suffering From Acute Infectious Diarrhea and Their Recovery After Treatment
Source: Front Microbiol. 2018 Jun 12;9:1230. doi: 10.3389/fmicb.2018.01230 (PMC6005867; doi:10.3389/fmicb.2018.01230)
Supplement: Supplementary Table 1 — Excel file with clinical data. Dehydration, fever and diarrhea duration are the variables included. [file Table_1.XLSX]

## Sheet: Hoja1
PATIENT	Age( months)	Weight (kg)	Fever	Dehydratation	diarrhea duration (hours)	diarrea at 24h	diarrea at 48h	diarrea at 72h	diarrea at 96h	diarrea at 120h
Case 1	39	14	37.9	1	72	1	1	2	2	2
Case 2	38	15.3	36	2	72	1	2	2	2	2
Case 3	37	14	36.5	1	48	1	2	2	2	2
Case 4	36	14	37	1	48	1	2	2	2	2
Case 5	36	16	36	1	72	1	1	2	2	2
Case 6	36	20	38	1	48	1	2	2	2	2
Case 7	36	18	36	1	72	1	1	2	2	2
Case 8	36	17	38	1	24	2	2	2	2	2
Case 9	36	14	36	2	72	1	1	2	2	2
Case10	36	15	36.7	2	72	1	1	2	2	2
1 = positive
2 = negative
